# Supplementary figures and images for: The PagKNAT2/6b-PagBOP1/2a Regulatory Module Controls Leaf Morphogenesis in Populus
Source: MDPI journal article supplement (doi:10.3390/ijms23105581), 2022-05-17

Supplementary Figures

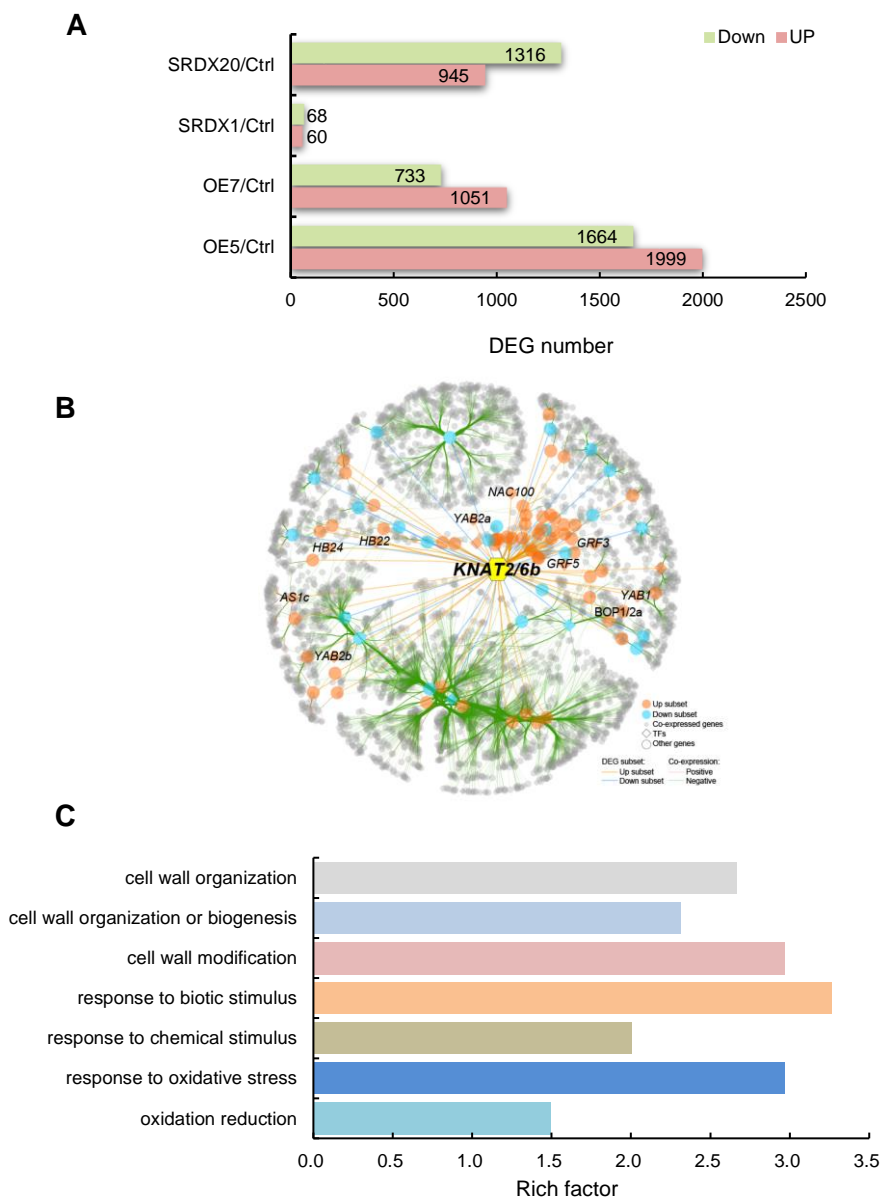

Figure S1



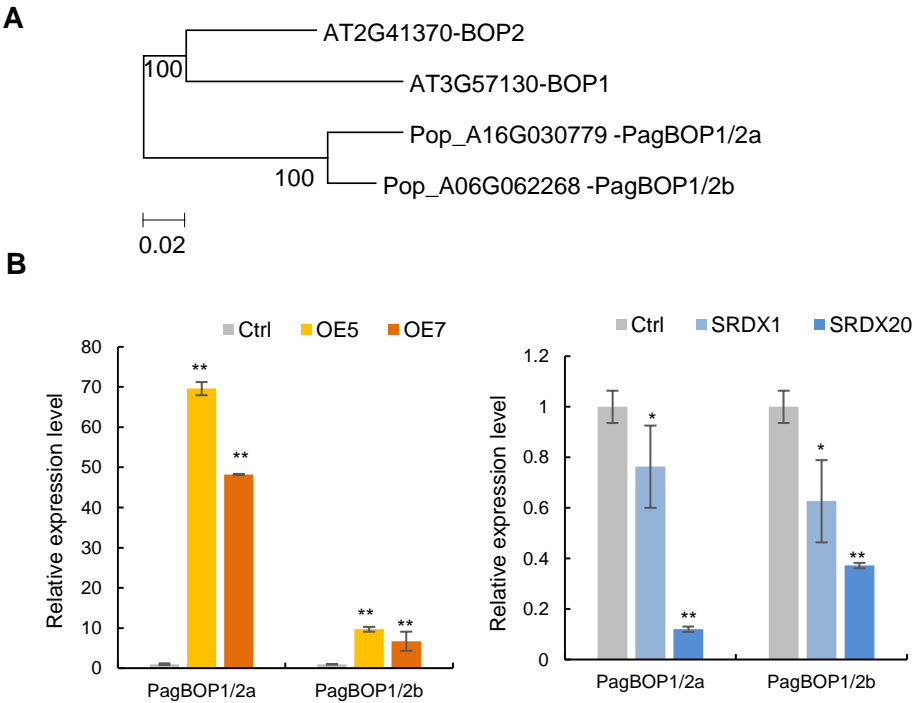

Figure S2

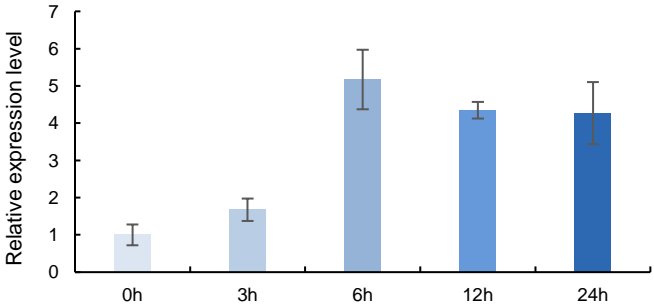

Figure S3



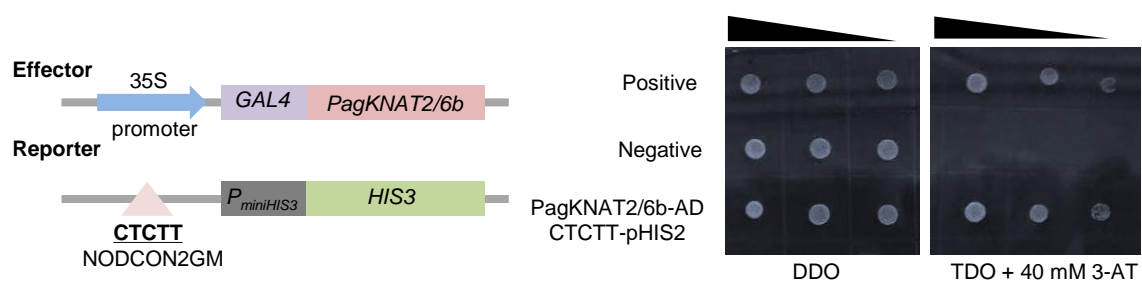

Figure S4

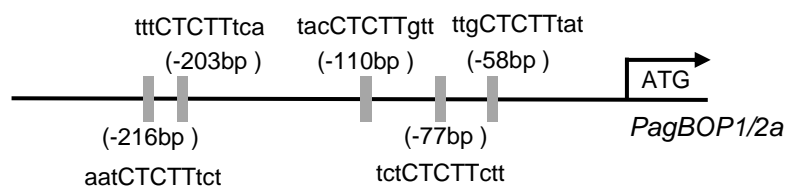

Figure S5

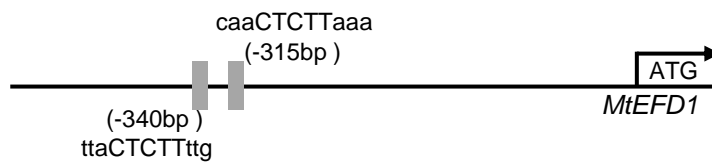

Figure S6

Supplement: s1 [file s1]
